# Supplementary material for: Subintimal Versus Intraluminal Approach for Femoropopliteal Chronic Total Occlusions Treated With Intravascular Ultrasound Guidance
Source: PubMed Central journal article supplement — J Am Heart Assoc. 2021 Oct 6;10(20):e021903. doi: 10.1161/JAHA.121.021903 (PMC8751881; doi:10.1161/jaha.121.021903), 2021-10-06
Supplement: JAH3-10-e021903-s001.pdf [file JAH3-10-e021903-s001.pdf]

# **Supplemental Material**

## **Participating centers and the investigators - IVORY Study Investigators**

1. *Omihachiman Community Medical Center*: Kan Zen
2. *Kanazawa Medical University Hospital*: Taketsugu Tsuchiya
3. *Kansai Rosai Hospital*: Takuya Tsujimura
4. *Graduate School of Medicine, Kyoto University*: Junichi Tazaki
5. *Japanese Red Cross Kyoto Daini Hospital*: Yoshinori Tsubakimoto
6. *Shin-Koga Hospital*: Yoshiaki Shintani
7. *Shinshu University Graduate School of Medicine*: Takashi Miura
8. *Tokai University School of Medicine*: Norihiko Shinozaki
9. *Tokyo Rosai Hospital*: Makoto Utsunomiya
10. *Morinomiya Hospital*: Daizo Kawasaki
11. *Saiseikai Fukuoka General Hospital*: Nobuhiro Suematsu
12. *Matsuyama Red Cross Hospital*: Terutoshi Yamaoka
13. *Yamagata University School of Medicine*: Hiroki Takahashi
14. *Saiseikai Yokohama-City Eastern Hospital*: Keisuke Hirano
15. *Kishiwada Tokushukai Hospital*: Masahiko Fujihara
16. *Osaka Saiseikai Nakatsu Hospital*: Amane Kozuki
17. *Kawakita General Hospital*: Atsushi Tosaka

18. *Chikamori Hospital*: Shuichi Seki
19. *Miyazaki Medical Association Hospital*: Tatsuya Nakama
20. *Oji General Hospital*: Nobuo Kato
21. *Saka General Hospital*: Shinya Sasaki
22. *Yamato Seiwa Hospital*: Tatsuki Dojjiri
23. *Tokyo Saiseikai Central Hospital*: Kenji Suzuki
24. *Osaka General Medical Center*: Yusuke Iwasaki
25. *Japanese Red Cross Otsu Hospital*: Hiroki Higami
26. *Iwaki Kyoritsu General Hospital*: Yoshito Yamamoto
27. *Shonan Kamakura General Hospital*: Kazuki Tobita
28. *Sapporo City General Hospital*: Yutaka Dannoura
29. *Kokura Memorial Hospital*: Yoshimitsu Soga
30. *Tokyo Medical University Ibaraki Medical Center*: Michiaki Higashitani
31. *Fukuoka University Hospital*: Makoto Sugihara
32. *Sendai Kousei Hospital*: Kazunori Horie
33. *Yao Municipal Hospital*: Kuniyasu Ikeoka

**Table S1. Details of Perioperative Complications.**

|                                  | SWP                  | IWP                 | P value |
|----------------------------------|----------------------|---------------------|---------|
| Perioperative complications      | 8.2% [3.5% to 13.0%] | 4.1% [1.5% to 6.7%] | 0.07    |
| All-cause death                  | 1.8% [0.0% to 3.7%]  | 0.1% [0.0% to 0.4%] | 0.15    |
| Myocardial infarction            | 0.0% [0.0% to 0.0%]  | 0.0% [0.0% to 0.0%] | 1.00    |
| Stroke                           | 0.0% [0.0% to 0.0%]  | 0.0% [0.0% to 0.0%] | 1.00    |
| Contrast-induced nephropathy*    | 0.6% [0.0% to 1.7%]  | 0.0% [0.0% to 0.0%] | <0.001  |
| Hemorrhage requiring transfusion | 1.8% [0.0% to 3.7%]  | 0.5% [0.0% to 1.0%] | 0.50    |
| Major amputation                 | 0.0% [0.0% to 0.0%]  | 0.3% [0.0% to 0.7%] | 1.00    |
| Any reintervention               | 1.8% [0.0% to 3.7%]  | 0.9% [0.0% to 2.1%] | 0.50    |
| Acute occlusion                  | 1.2% [0.0% to 2.8%]  | 0.3% [0.0% to 0.9%] | 0.31    |
| Distal embolization              | 1.8% [0.0% to 3.7%]  | 1.2% [0.0% to 2.5%] | 0.73    |
| Vascular rupture                 | 1.2% [0.0% to 2.8%]  | 0.4% [0.0% to 1.1%] | 0.58    |
| Blue toe syndrome                | 0.0% [0.0% to 0.0%]  | 0.3% [0.0% to 0.9%] | 1.00    |
| Infection at the puncture site   | 0.0% [0.0% to 0.0%]  | 0.0% [0.0% to 0.0%] | 1.00    |

Data are estimates and 95% confidence intervals.

\*Contrast-induced nephropathy was defined as an increase of  $\geq 25\%$  or  $\geq 0.5\text{mg/dl}$  in pre-procedure serum creatinine at 48 h after procedure.

**Table S2. Relationship Between the Length of Subintimal Track and Clinical Outcomes in Lesions with Subintimal Wire Passage.**

| Outcomes                        | Relationship of the length of subintimal track |
|---------------------------------|------------------------------------------------|
| Endovascular treatment          |                                                |
| Procedure time                  | $r=0.07$ [-0.05 to 0.19] (P=0.25)              |
| Contrast agent volume           | $r=0.08$ [-0.04 to 0.20] (P=0.19)              |
| Postoperative outcomes          |                                                |
| Residual stenosis               | $r=0.00$ [-0.12 to 0.12] (P=0.99)              |
| IVUS-derived minimum lumen area | $r=0.09$ [-0.03 to 0.21] (P=0.12)              |
| Ankle-brachial index            | $r=-0.06$ [-0.18 to 0.07] (P=0.38)             |
| Perioperative complications     | OR=0.98 [0.71 to 1.36] (P=0.90)                |
| One-year clinical outcomes      |                                                |
| Restenosis                      | OR=1.07 [0.88 to 1.30] (P=0.50)                |
| All-cause mortality             | HR=1.05 [0.73 to 1.51] (P=0.81)                |
| Major amputation                | HR=0.09 [0.00 to 9.69] (P=0.31)                |
| Major adverse limb events       | HR=0.96 [0.79 to 1.16] (P=0.65)                |

Data are presented as correlation coefficients ( $r$ ), odds ratios per 5-cm increase (OR), or hazard ratios per 5-cm increase (HR) and their 95% confidence interval, as well as  $P$  values.
